# Supplementary material for: The adverse role of excess negative ions in reducing the photoluminescence from water soluble MAA–CdSe/ZnS quantum dots in various phosphate buffers
Source: Royal Society of Chemistry journal article supplement (doi:10.1039/c8cp06213g), 2018-01-01
Supplement: c8cp06213g1.pdf [file c8cp06213g1.pdf]

## Supplementary Information

**Figure S1:**

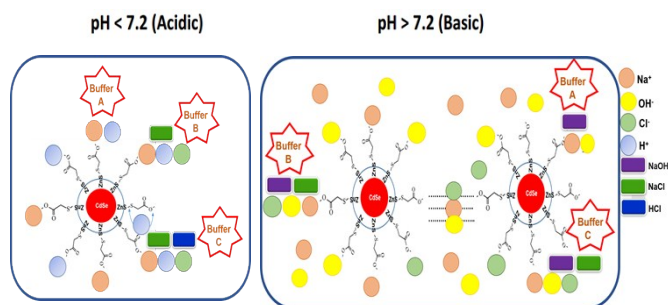

**Figure S1:** Molecular representation of MAA-CdSe/ZnS QDs in varied pH environment and presence of excess ions. (for  $\text{pH} < 7.2$ ;  $\text{Na}^+$ ,  $\text{H}^+$  ions (Buffer A),  $\text{Na}^+$ ,  $\text{H}^+$ ,  $\text{Cl}^-$  (Buffers B and C); for  $\text{pH} > 7.2$   $\text{Na}^+$ ,  $\text{OH}^-$  (Buffer A),  $\text{Na}^+$ ,  $\text{OH}^-$ ,  $\text{Cl}^-$  (Buffers B and C)).
